# Supplementary material for: Identification of IDH-mutant gliomas by a prognostic signature according to gene expression profiling
Source: Aging (Albany NY). 2018 Aug 15;10(8):1977–88. doi: 10.18632/aging.101521 (PMC6128431; doi:10.18632/aging.101521)
Supplement: Table S1 [file aging-10-101521-s001.xlsx]

## Sheet: Sheet1
Table S1. Genes with high prognostic value in two datasets.
A total of 535 genes and 34 genes with high prognostic value (AUC≥0.7，both 3 years and 5 years) were selected in CGGA and TCGA dataset, respectively
CGGA(AUC≥0.8)				TCGA(AUC≥0.7)
Time-dependent AUC	3 years	5 years		Time-dependent AUC	3 years	5 years
EMD	0.829806	0.827082		RNF115	0.712532	0.707389
EXT1	0.832506	0.841234		SKP2	0.729552	0.708138
GBE1	0.870915	0.908349		RAD54B	0.721786	0.71155
GLA	0.847751	0.820603		SMC1A	0.745446	0.706633
JAG1	0.85776	0.831395		STIL	0.724195	0.71246
LIG1	0.829614	0.832834		RAD18	0.805585	0.768568
PLOD1	0.868565	0.929741		BRCA1	0.807283	0.700702
PMM2	0.847325	0.826296		HILS1	0.741796	0.701713
IGFBP2	0.870333	0.853916		ONECUT2	0.744178	0.731851
IL10RB	0.837415	0.812127		HIST1H1C	0.73782	0.734059
ANXA1	0.81879	0.853371		HIST1H3J	0.795815	0.743367
CYP27B1	0.880947	0.808194		HIST1H3H	0.707097	0.762619
P4HB	0.847778	0.833329		LOC286467	0.728488	0.734511
PLAT	0.856169	0.802911		HIST1H2BL	0.775417	0.724479
PRIM2	0.870743	0.860899		HIST1H2BO	0.725601	0.763579
PTGIR	0.828748	0.803612		HIST1H2BJ	0.703374	0.703216
C9orf170	0.802803	0.813957		HOXD4	0.764262	0.753305
EXOSC10	0.811626	0.906782		FBXO4	0.722267	0.710605
EXOSC3	0.820364	0.809637		C14orf145	0.713097	0.713534
SMC4	0.858452	0.807605		PRR11	0.761877	0.72574
ZNF599	0.810597	0.897783		ZNF273	0.781874	0.706344
PPP1CA	0.874458	0.869614		C1orf187	0.744684	0.723214
ZCCHC11	0.809999	0.892021		PIK3R3	0.713414	0.709558
KDM1A	0.872283	0.874088		CDC25A	0.703702	0.739246
TMEM201	0.863233	0.904514		ERBB3	0.71447	0.712972
CLEC18B	0.837196	0.86746		WEE1	0.868309	0.721559
BIRC5	0.910721	0.835036		HOXD10	0.75685	0.743001
USP1	0.851196	0.875111		IRX5	0.753487	0.736913
SERBP1	0.815586	0.880015		SAP130	0.742495	0.72139
C1orf53	0.832434	0.829582		HOXD3	0.713209	0.71266
CD276	0.825717	0.825218		POLA1	0.810287	0.713957
TFPI	0.879535	0.928641		MAP3K1	0.738401	0.74033
TMPO	0.883162	0.822561		CENPO	0.787591	0.708349
AGBL5	0.823211	0.815835		PLEKHA2	0.779302	0.712417
C10orf25	0.83817	0.870758
C19orf55	0.856318	0.927372
RHOC	0.868495	0.960288
RCC1	0.824046	0.842517
TOP2A	0.912743	0.813273
TUBG1	0.85782	0.821273
ZNF436	0.817366	0.844513
WDR62	0.889	0.861692
PDS5A	0.821	0.827484
KDELR2	0.876907	0.854284
TROAP	0.900879	0.814818
NRD1	0.802374	0.854035
ACTN1	0.816307	0.848195
SIKE1	0.820047	0.830649
MAPK3	0.809233	0.85943
FLNA	0.843649	0.89569
ECE1	0.813915	0.829455
CHEK1	0.875671	0.800311
HDGF	0.83738	0.809313
MAD2L2	0.86184	0.879628
RAD51AP1	0.874348	0.806186
HS2ST1	0.808513	0.906699
OST4	0.818399	0.805307
FKBP7	0.820085	0.802217
TAF12	0.834854	0.913174
RBBP4	0.853374	0.897466
GDAP2	0.80221	0.865379
RPN2	0.852494	0.861123
TCF3	0.838425	0.812573
GRAMD1A	0.847128	0.847255
SLC25A39	0.838355	0.843239
WEE1	0.869139	0.81501
SLC30A7	0.837674	0.825373
WDR67	0.811546	0.808209
TPM4	0.881264	0.820272
DSN1	0.843901	0.807652
CSDA	0.824176	0.879666
MTMR11	0.828046	0.829891
TULP3	0.827089	0.883401
FAM122C	0.85729	0.885284
GPR137	0.809963	0.835064
MEX3D	0.867092	0.880823
NKX3-2	0.806681	0.818174
SRSF10	0.852157	0.910935
ATF5	0.820484	0.821348
MLLT10	0.867354	0.873125
NIP7	0.853636	0.883981
SLC4A2	0.849699	0.870094
PSMB2	0.875835	0.931518
NETO2	0.821794	0.852547
SERPINH1	0.872462	0.834059
CASP2	0.820442	0.802141
CASP6	0.820387	0.856838
CCNA2	0.904723	0.814178
NUP93	0.879665	0.888981
PAPOLA	0.812314	0.858472
ISYNA1	0.836562	0.862701
CDC6	0.89311	0.81997
CDC20	0.923543	0.859481
PSMC3IP	0.815822	0.822396
LRRC42	0.832104	0.90669
CDCA8	0.872174	0.844823
PSMD9	0.802722	0.814124
PRC1	0.903932	0.803206
MCM3	0.868852	0.868721
NRM	0.88902	0.865604
MEAF6	0.827803	0.87446
CSNK1G2	0.812645	0.806762
DAPK3	0.830993	0.849737
DHX15	0.849724	0.813005
DPAGT1	0.815939	0.884212
DPH2	0.805858	0.859677
ELAVL1	0.843111	0.8092
EN2	0.860955	0.948074
FBL	0.832075	0.857119
CDH11	0.815099	0.882381
CDK2	0.900706	0.867774
CEBPG	0.847138	0.803978
CENPA	0.906439	0.846471
CKS1B	0.866034	0.811821
COL4A1	0.861057	0.825427
COL4A2	0.855394	0.836905
COL6A2	0.856281	0.827178
CTPS1	0.897632	0.893956
DR1	0.834676	0.885304
E2F4	0.82811	0.810712
ETV6	0.802589	0.865151
GAS1	0.819552	0.817266
H2AFX	0.865032	0.893642
HNRNPA2B1	0.807558	0.820674
HOXD10	0.817848	0.81743
KIFC1	0.905256	0.812401
KPNA2	0.906837	0.846521
LAMC1	0.825935	0.802705
LIG3	0.809791	0.837462
LOX	0.814504	0.835562
LOXL2	0.841339	0.86676
MAD2L1	0.911135	0.804634
MAGOH	0.900593	0.95107
MFNG	0.828409	0.810489
MYBL2	0.91719	0.822118
NRAS	0.872107	0.915839
TNFRSF11B	0.835487	0.859111
PCOLCE	0.804952	0.80952
PGD	0.869127	0.917129
PLAGL2	0.811592	0.854561
POLA2	0.882175	0.814813
PPP4C	0.865237	0.897386
PSMA7	0.801716	0.850481
PSMD8	0.812412	0.836951
PTBP1	0.828016	0.807236
PTMS	0.836979	0.880708
RARS	0.806858	0.85209
RBBP8	0.852997	0.802273
RBL1	0.840121	0.813409
RPA1	0.845804	0.892353
RPN1	0.86226	0.811868
RPS2	0.845408	0.839125
SMARCE1	0.883795	0.863442
SNAPC2	0.840948	0.876156
FSCN1	0.808448	0.807265
SNRPA1	0.872946	0.854831
SNRPB	0.860401	0.837571
SNRPC	0.860318	0.864524
SNRPG	0.887983	0.827677
UAP1	0.821358	0.814693
SRM	0.857102	0.908608
SSRP1	0.813919	0.814809
TCEB3	0.853421	0.93914
TGIF1	0.856985	0.93718
TIMP1	0.808002	0.80517
TTK	0.902704	0.814156
UBE2I	0.890781	0.88868
VIM	0.867587	0.974311
VRK1	0.871139	0.861887
ZBTB17	0.807463	0.850246
HIST1H2BG	0.846829	0.811516
TTF2	0.881274	0.917982
EIF3I	0.833332	0.902472
SRSF9	0.881421	0.889781
SNX4	0.874376	0.887543
FADD	0.868134	0.844735
IQGAP1	0.805241	0.886986
TMEM11	0.853231	0.830972
GGH	0.838419	0.816881
ZNF259	0.825041	0.842661
BCL10	0.812124	0.871134
CAPN5	0.829158	0.876134
E2F2	0.903013	0.888458
ACTL6A	0.858937	0.805657
CALR	0.807242	0.813047
CDC34	0.809509	0.832068
DAP	0.819878	0.898887
EFNB1	0.887548	0.90722
FOXD1	0.861703	0.938046
GOLGA2	0.815506	0.807112
HNRNPAB	0.857595	0.819274
MCM2	0.885893	0.807573
YBX1	0.879571	0.924171
SMS	0.814409	0.851274
SNRPA	0.813533	0.855029
TTC4	0.809706	0.87793
CCNB2	0.918012	0.834529
PDCD5	0.883572	0.91362
ZW10	0.839502	0.824215
MTA2	0.833726	0.831439
B4GALT5	0.809251	0.872798
SNRNP40	0.863873	0.912455
EIF4E2	0.83388	0.82847
SEC22B	0.830935	0.927976
PDIA4	0.857287	0.892743
ACTN4	0.864311	0.873698
MMP14	0.803197	0.824701
ABCC1	0.814583	0.844477
PFN1	0.870182	0.891518
PLK1	0.894784	0.848388
SFPQ	0.847843	0.850934
THRAP3	0.843798	0.938432
CA3	0.829123	0.895665
CBX2	0.900012	0.892621
CDKN3	0.888485	0.833364
DDOST	0.880465	0.939332
GNG5	0.883646	0.959417
NFIL3	0.824085	0.863051
HMGN2	0.850238	0.895308
HOXA11	0.85786	0.879202
HSPG2	0.834163	0.825318
LMNB1	0.88782	0.816781
SRSF4	0.849915	0.917813
SOLH	0.838702	0.842037
ARPC5	0.869077	0.849673
CTDSP2	0.805557	0.830192
KIF20A	0.884885	0.802008
ALYREF	0.885693	0.844999
ZMPSTE24	0.806537	0.915248
TRAIP	0.854113	0.804699
SIX1	0.802122	0.823539
CLPP	0.807647	0.811912
CDC123	0.802981	0.834835
TUBB4B	0.810147	0.835161
NDC80	0.910623	0.818011
CAPZA1	0.85787	0.931995
SHFM1	0.853016	0.868042
HMG20B	0.813022	0.880921
TACC3	0.909247	0.80401
PPIH	0.839155	0.90235
HMGN4	0.817633	0.8169
LRRC41	0.818037	0.895383
VAT1	0.818022	0.871387
RNASEH2A	0.885316	0.824686
LAMTOR5	0.817713	0.862745
POLR3C	0.820211	0.814991
GNAI3	0.849811	0.929859
TRIM27	0.844386	0.829443
SARS	0.803189	0.836636
IGF2BP3	0.860258	0.826985
PHTF1	0.832963	0.890605
POP4	0.805523	0.879588
IQGAP2	0.816318	0.816426
DBF4	0.893719	0.852784
SNTB2	0.833147	0.857954
WDR3	0.874843	0.922353
SF3A3	0.870122	0.922697
SEC61B	0.843947	0.801827
PDIA5	0.881878	0.939344
KIF2C	0.922673	0.892779
HOXA7	0.801917	0.836581
HOXD3	0.887273	0.852331
CNTRL	0.854492	0.908158
DUSP14	0.805976	0.858969
EMILIN1	0.878693	0.905039
FAF1	0.880819	0.907112
FSTL1	0.850738	0.859579
ZNF90	0.885193	0.800724
PRSS23	0.811203	0.848187
DDX20	0.838099	0.916586
DUSP10	0.848647	0.841234
SNF8	0.843593	0.859082
LYPLA2	0.850472	0.91079
STK38	0.889758	0.919579
OIP5	0.863443	0.806374
TARDBP	0.834871	0.880748
CD93	0.844784	0.817753
CHIC2	0.886359	0.857135
TPX2	0.902174	0.805872
FOXD3	0.813892	0.862344
XRN2	0.836162	0.830629
TRAM2	0.900721	0.937881
ESPL1	0.899227	0.804349
KIF4A	0.907269	0.818146
LSM4	0.842046	0.826289
GTPBP4	0.83704	0.815444
ICMT	0.818137	0.94197
SF3B3	0.806196	0.800414
SNAPIN	0.801436	0.850277
TBL2	0.812527	0.810286
NXT1	0.841016	0.830057
GNL2	0.884974	0.938321
SEC61A1	0.865726	0.831528
NRBP1	0.854929	0.816854
CLIC4	0.828397	0.868273
ATAD2	0.867317	0.848307
NUDT5	0.871443	0.862567
ORMDL2	0.8113	0.825753
HOXD9	0.871283	0.836337
GNPAT	0.830515	0.808037
ADAMTS7	0.862994	0.84701
DNAJC8	0.856688	0.895038
DNAJC2	0.84505	0.907247
UBE2S	0.859182	0.812356
DNTTIP2	0.864577	0.928369
HOXD4	0.881592	0.845084
TTI1	0.816641	0.851496
KDM4A	0.844557	0.898175
CROCC	0.805264	0.889513
KNTC1	0.895018	0.824848
EIF4A3	0.813748	0.807154
NCAPD2	0.896907	0.923715
KIF14	0.909002	0.866026
PDAP1	0.823549	0.893518
ERP44	0.849372	0.823129
SIPA1L3	0.839509	0.8958
SMC5	0.806826	0.844395
NUP205	0.863004	0.897357
DNAJC9	0.875929	0.817948
HAUS5	0.864078	0.882705
NUP188	0.836116	0.822755
DCAF13	0.857005	0.837945
OLFML2B	0.818739	0.909472
REXO2	0.813451	0.851036
NOC2L	0.805654	0.878747
GPX7	0.904145	0.939878
ZNF593	0.817491	0.872598
TXNDC12	0.832387	0.930036
IFT52	0.847544	0.856099
UTP11L	0.877215	0.915896
DESI2	0.828692	0.817148
HSPB11	0.831856	0.893877
WDR83OS	0.800761	0.828495
SDF4	0.828004	0.936627
MRTO4	0.815369	0.86729
LSM7	0.834538	0.806472
PLEKHO1	0.829036	0.82083
HP1BP3	0.802614	0.899747
GTF2IRD1	0.803921	0.817898
CENPF	0.908192	0.839038
MRPL37	0.853184	0.892292
TNFRSF12A	0.844524	0.869219
PLXNA3	0.818687	0.877197
C2orf29	0.836041	0.843887
DONSON	0.854217	0.8223
FBXL12	0.809205	0.82042
PNRC2	0.89518	0.923257
CHCHD3	0.844425	0.878376
WRAP73	0.835975	0.892478
ADPRHL2	0.845273	0.887729
FAM206A	0.834475	0.897036
NBPF1	0.81437	0.885284
TMEM248	0.803796	0.918662
GPATCH1	0.801294	0.9104
TMEM39B	0.866469	0.902254
CEP55	0.907616	0.806919
ASPM	0.907951	0.83204
PRMT6	0.810754	0.850168
ASF1B	0.898531	0.828413
EVA1B	0.842488	0.813391
C1orf112	0.82764	0.871754
NEIL3	0.88304	0.818147
MRGBP	0.829591	0.855006
PRR11	0.873778	0.920307
MIS18BP1	0.811791	0.810754
MNS1	0.820143	0.847202
BIN3	0.848998	0.879716
CTTNBP2NL	0.817076	0.917497
CHPF2	0.804643	0.844038
PUS7	0.864662	0.864733
HOXA5	0.869596	0.864497
C19orf10	0.859022	0.834711
RNPEP	0.840514	0.907626
KIF15	0.896668	0.827832
SLAIN2	0.835293	0.807114
HIST1H2AE	0.859056	0.813387
HIST1H2BJ	0.874227	0.802131
HIST1H2AG	0.80785	0.808765
GINS1	0.887074	0.816077
TMSB10	0.808065	0.819027
TRAF2	0.88407	0.853711
LSM2	0.818132	0.812796
PRUNE	0.805653	0.855981
WIZ	0.805447	0.849038
TMEM8A	0.881472	0.873313
CDC25B	0.882878	0.871616
ZNF69	0.815859	0.85898
HAND2	0.830779	0.852541
TIA1	0.852823	0.839235
MTBP	0.869156	0.810095
CLSPN	0.87057	0.821909
C11orf24	0.808159	0.812779
NCAPG	0.878586	0.8152
SUSD1	0.806616	0.813235
EBF2	0.803046	0.811723
EXO5	0.894623	0.90261
PLEKHG2	0.887233	0.887157
DCLRE1B	0.859496	0.941002
CENPH	0.902611	0.875476
VKORC1	0.86016	0.840336
AUNIP	0.83071	0.826587
DDX50	0.821829	0.851136
NUP37	0.847169	0.816066
PDCL3	0.897025	0.814873
WDR77	0.882396	0.945492
METTL22	0.800342	0.800243
RBM42	0.809776	0.878347
HECTD3	0.837989	0.908558
HSPBAP1	0.821225	0.838904
YRDC	0.867951	0.880114
GLT25D1	0.838433	0.856031
SNIP1	0.800692	0.908092
SHCBP1	0.919302	0.837275
EHMT1	0.817074	0.811429
ZMYM1	0.808572	0.894176
RNF122	0.893882	0.87671
NUP85	0.855443	0.861753
WDR76	0.829194	0.802657
CCDC15	0.814069	0.865546
CEP135	0.900569	0.906477
RPF1	0.843839	0.922446
TOE1	0.841663	0.885491
ITPKC	0.807772	0.943401
ZSCAN16	0.853871	0.829674
REEP4	0.887353	0.868173
LIMD2	0.826766	0.810774
APOL4	0.806135	0.862481
FAM83D	0.861269	0.803878
KIF18A	0.896195	0.881206
MRPS15	0.813042	0.874818
CDCA3	0.918029	0.861515
FRMD8	0.837392	0.861103
CDCA7	0.852805	0.838237
CCNB1	0.897878	0.845017
BRIP1	0.892703	0.816311
WDR54	0.822979	0.815747
TRAF7	0.876663	0.882215
ZDHHC18	0.878003	0.949763
FBXW9	0.838463	0.876305
GINS4	0.895573	0.845119
TUBB6	0.881745	0.893007
LMNB2	0.900399	0.877493
CEP89	0.847824	0.950452
ARHGEF39	0.882169	0.824628
FAM136A	0.870549	0.882372
AJUBA	0.827575	0.894637
SYDE1	0.888535	0.928666
WDR34	0.884204	0.89058
MGME1	0.887651	0.895476
DNTTIP1	0.834996	0.819196
UBE2J2	0.821666	0.864698
HIST1H2BK	0.832399	0.855232
ROMO1	0.802865	0.811736
DCBLD2	0.849569	0.892177
PYGO2	0.850016	0.889104
KIAA2013	0.804395	0.876868
TP53I13	0.81218	0.829121
DCAF15	0.838328	0.81472
C19orf52	0.882873	0.813613
FAM114A1	0.823194	0.809668
SHKBP1	0.850892	0.913781
EXOC3L2	0.830681	0.808937
PPP1R14B	0.840221	0.864688
DPP9	0.83239	0.870285
RPIA	0.848992	0.810897
HN1L	0.870034	0.816264
SCLT1	0.816095	0.832981
CCDC138	0.879775	0.840014
C11orf82	0.886631	0.8216
RTKN2	0.893748	0.805536
NUF2	0.911988	0.83718
TICRR	0.856402	0.874534
ZNF439	0.817792	0.80434
C19orf40	0.909393	0.891492
PARS2	0.816347	0.88806
NASP	0.855786	0.909234
LSM12	0.833288	0.801117
EME1	0.875567	0.815683
ZNF560	0.839458	0.825992
KANSL1L	0.813513	0.883375
CDCA2	0.899922	0.851693
DCP1B	0.803837	0.882306
AKNAD1	0.846994	0.84957
LRWD1	0.801446	0.887542
PUSL1	0.834559	0.889158
HOXC4	0.816143	0.826837
ZNF367	0.908817	0.828793
PHF13	0.843529	0.9049
SALL3	0.813662	0.842064
CBWD2	0.803594	0.807777
NSMCE2	0.844724	0.850323
LYG1	0.820936	0.834057
GAS2L3	0.817595	0.815708
TXLNA	0.886493	0.953382
TUBB	0.86682	0.843369
ZNF598	0.840376	0.815717
UBE2C	0.890239	0.819889
ZBTB12	0.857246	0.839031
SPC24	0.901299	0.826291
SASS6	0.886978	0.949563
MMS22L	0.862841	0.842441
C19orf54	0.80073	0.868474
DRAXIN	0.869957	0.852287
C5orf34	0.876117	0.82023
AGRN	0.844955	0.880646
LRRK2	0.814704	0.81372
CARM1	0.846555	0.93019
CCDC137	0.806612	0.850018
POLQ	0.899938	0.803508
TEAD4	0.826803	0.805749
PDLIM7	0.815455	0.839746
LRR1	0.844359	0.802255
CCDC18	0.899105	0.938286
C1orf174	0.817623	0.915422
LOC100127888	0.801743	0.802428
LOC400043	0.826032	0.841176
RHPN1-AS1	0.858723	0.879029
FOXD2-AS1	0.87758	0.90561
BTN2A3P	0.818676	0.864066
CRNDE	0.922915	0.880699
HIST2H2BC	0.811863	0.801978
MSH5-SAPCD1	0.842694	0.801693
ITGB3BP	0.838098	0.874927
HOXD8	0.870098	0.851051
EZH2	0.895942	0.869424
PKMYT1	0.874035	0.832339
DLGAP5	0.904017	0.835399
GJA3	0.807175	0.84862
HOXA11-AS	0.864021	0.870566
HOXD-AS2	0.881724	0.824089
OR4N2	0.808244	0.899954
MCM10	0.874075	0.822447
IRX5	0.819197	0.800984
HOXA10	0.874697	0.815119
EXO1	0.901711	0.821361
