# Supplementary material for: Identification of IDH-mutant gliomas by a prognostic signature according to gene expression profiling
Source: Aging (Albany NY). 2018 Aug 15;10(8):1977–88. doi: 10.18632/aging.101521 (PMC6128431; doi:10.18632/aging.101521)
Supplement: Table S2 [file aging-10-101521-s002.xlsx]

## Sheet: CGGA+TCGA
Table S2. Genes that were strongly correlated with ES in two datasets.
Pearson correlation analysis was utilized to select genes that were strongly correlated with ES (Pearson R≥0.5 in CGGA, Pearson R≥0.4 in TCGA). As a result, 637 and 344 genes in CGGA and TCGA data set met the criteria, respectively.
CGGA Pearson R≥0.5					TGGA Pearson R≥0.4
Gene	Pearson R	pvalue			Gene	Pearson R	pvalue
HIST1H2BJ	0.560405	3.41e-15			NCBP1	0.410247	8.89156e-17
HOXD3	0.712225	3.78e-27			NUP93	0.517014	3.1858e-27
HOXD4	0.671024	3.35e-23			STK40	0.442975	1.3434e-19
IRX5	0.546049	2.31e-14			ZNF45	0.445938	7.20064e-20
PRR11	0.644399	5.69e-21			PDIA5	0.436387	5.25929e-19
WEE1	0.571633	7.14e-16			KHDRBS1	0.422723	8.12315e-18
BRCA2	0.580086	2.12e-16			TTC4	0.429603	2.07894e-18
FANCA	0.589042	5.62e-17			IFI16	0.402435	3.78409e-16
GBE1	0.505666	3.17e-12			CEPT1	0.424249	6.0203e-18
GLA	0.586418	8.32e-17			CLIC4	0.459094	4.19252e-21
MSH6	0.508188	2.37e-12			RIT1	0.453698	1.36597e-20
JAG1	0.553622	8.51e-15			NSUN4	0.441372	1.87772e-19
LIG1	0.613756	1.16e-18			DLGAP5	0.422432	8.5993e-18
PLOD1	0.620198	3.97e-19			MYCBP	0.451903	2.0141e-20
PMM2	0.538264	6.28e-14			HOXA6	0.406281	1.86365e-16
COL5A2	0.504062	3.8e-12			HOXA5	0.465804	9.37087e-22
TWIST1	0.537251	7.14e-14			HOXA4	0.41674	2.59123e-17
DHFR	0.503992	3.83e-12			HOXA3	0.402372	3.82796e-16
GRIK3	0.537842	6.62e-14			HOXA13	0.458682	4.59211e-21
P4HB	0.58717	7.44e-17			HOXA11	0.489778	3.3575e-24
PRIM2	0.646351	3.97e-21			HOXA10	0.538031	9.48796e-30
PTGIR	0.519496	6.32e-13			RAD54B	0.537086	1.24336e-29
EXOSC10	0.550251	1.33e-14			PPPDE1	0.445492	7.9128e-20
EXOSC3	0.525784	2.96e-13			CAP1	0.420159	1.3392e-17
SMC4	0.611074	1.79e-18			SRBD1	0.415761	3.12636e-17
ZWINT	0.606795	3.57e-18			PSMB2	0.426815	3.62502e-18
LRIF1	0.555266	6.83e-15			C20orf72	0.466764	7.54268e-22
ZNF599	0.513701	1.25e-12			ORC1L	0.493762	1.26088e-24
KDM1A	0.60324	6.29e-18			RLF	0.44317	1.28964e-19
TMEM201	0.540265	4.87e-14			RRP1B	0.403665	3.02025e-16
ZIK1	0.504993	3.42e-12			PPP1R8	0.457717	5.6794e-21
CENPP	0.50804	2.41e-12			LRRC41	0.452208	1.88609e-20
BIRC5	0.633068	4.35e-20			LRRC42	0.479812	3.68261e-23
USP1	0.586687	8e-17			TTC26	0.48671	7.0773e-24
ESCO2	0.594648	2.4e-17			TRAM2	0.475828	9.38861e-23
SH3PXD2B	0.513447	1.29e-12			ITGB3BP	0.457539	5.90605e-21
SERBP1	0.524553	3.44e-13			STIL	0.524359	4.36848e-28
FANCD2	0.586113	8.71e-17			DDX20	0.502417	1.43531e-25
CD276	0.632159	5.1e-20			SLAIN2	0.408733	1.18082e-16
KIAA0101	0.561875	2.79e-15			SIX1	0.451075	2.40723e-20
CYB5RL	0.522661	4.32e-13			DCAF13	0.428117	2.79793e-18
TFPI	0.561944	2.76e-15			GBE1	0.503059	1.21868e-25
TMPO	0.613437	1.22e-18			RPA1	0.427653	3.06897e-18
RRM1	0.533241	1.18e-13			NCAPG2	0.433937	8.67017e-19
NPM1	0.501742	4.94e-12			RECQL	0.417856	2.09079e-17
C10orf25	0.541585	4.11e-14			PRKRIR	0.44872	3.98754e-20
ARHGAP11B	0.545599	2.45e-14			ACTR3	0.418891	1.71209e-17
C19orf55	0.59159	3.82e-17			GNL3L	0.422303	8.81895e-18
INCENP	0.508735	2.23e-12			XRN2	0.451674	2.11632e-20
MUTYH	0.504284	3.71e-12			OSR2	0.5574	3.06743e-32
PHACTR4	0.510177	1.89e-12			MFNG	0.420337	1.29373e-17
RCC1	0.533364	1.16e-13			UTP11L	0.414384	4.06602e-17
TOP2A	0.611497	1.67e-18			EN1	0.402252	3.9127e-16
TUBG1	0.614507	1.02e-18			RAD18	0.498668	3.70683e-25
TYMS	0.601396	8.41e-18			E2F2	0.484938	1.08511e-23
ZNF436	0.52862	2.09e-13			GNG12	0.429128	2.28668e-18
SLC39A7	0.503174	4.2e-12			SMC5	0.405218	2.26857e-16
GJC1	0.553018	9.23e-15			ZZZ3	0.491175	2.38494e-24
DNA2	0.530282	1.71e-13			GAS2L3	0.433781	8.94961e-19
BEND3	0.543773	3.1e-14			PHACTR4	0.488333	4.77475e-24
CCDC150	0.610016	2.13e-18			DHDDS	0.409947	9.4079e-17
WDR62	0.616912	6.87e-19			BRCA1	0.426666	3.73385e-18
MEX3A	0.567698	1.24e-15			OR4N2	0.455342	9.55288e-21
ZNF146	0.510258	1.87e-12			MIER1	0.410243	8.89902e-17
SBNO2	0.515527	1.01e-12			LMNB2	0.409813	9.64611e-17
PDS5A	0.564554	1.93e-15			FOXD1	0.51458	6.08824e-27
KDELR2	0.590216	4.71e-17			DEM1	0.450434	2.76302e-20
TROAP	0.666195	8.84e-23			DEK	0.493768	1.25883e-24
FAM72B	0.572117	6.67e-16			NRD1	0.404077	2.79983e-16
ECE1	0.515999	9.56e-13			GNAI3	0.518558	2.10665e-27
FANCI	0.555513	6.61e-15			DDOST	0.513919	7.25269e-27
DEPDC1	0.637366	2.03e-20			RRAGC	0.404096	2.79e-16
CHEK1	0.645984	4.25e-21			CLP1	0.43179	1.3394e-18
FAM72A	0.508912	2.18e-12			MUTED	0.440932	2.05774e-19
HDGF	0.574947	4.45e-16			HMGN4	0.463954	1.42099e-21
MAD2L2	0.633526	4.01e-20			HMGN2	0.410446	8.56608e-17
CCDC77	0.553372	8.8e-15			MTFR1	0.445053	8.6803e-20
AP1M1	0.502531	4.52e-12			HS2ST1	0.453518	1.42039e-20
HMGB2	0.567385	1.3e-15			CMTM6	0.446717	6.10627e-20
DNMT1	0.535764	8.61e-14			CCDC18	0.45197	1.98539e-20
RAD51AP1	0.550666	1.26e-14			SIPA1L3	0.419578	1.49899e-17
BTG3	0.525121	3.21e-13			GNG5	0.423349	7.18459e-18
NT5DC2	0.524287	3.55e-13			ALG6	0.408493	1.23502e-16
CDC7	0.536413	7.94e-14			SMARCE1	0.423075	7.58242e-18
PPP1R18	0.507607	2.54e-12			CRLF3	0.40183	4.22646e-16
FKBP7	0.542653	3.58e-14			2018-09-15	0.456162	7.98587e-21
TAF12	0.503396	4.1e-12			SGOL1	0.40133	4.63074e-16
RBBP4	0.594156	2.58e-17			SGOL2	0.427946	2.89491e-18
PABPC4	0.502193	4.7e-12			CCDC15	0.449809	3.15886e-20
RPN2	0.517756	7.77e-13			ZNF644	0.452348	1.82985e-20
TCF3	0.580383	2.03e-16			VIM	0.400626	5.2631e-16
GRAMD1A	0.515275	1.04e-12			TXNDC12	0.45259	1.73665e-20
FBXO5	0.589635	5.14e-17			SEC22B	0.421312	1.07028e-17
SLC25A39	0.544015	3.01e-14			ERI1	0.413956	4.41109e-17
WRAP53	0.553664	8.47e-15			CSDE1	0.419689	1.46719e-17
SLC30A7	0.549245	1.52e-14			PSMD11	0.416503	2.71174e-17
ZNF286B	0.509367	2.07e-12			EXOSC10	0.412916	5.37408e-17
TPM4	0.63788	1.85e-20			KIF4A	0.408416	1.25275e-16
DSN1	0.559575	3.82e-15			FPGT	0.455234	9.78026e-21
CSDA	0.537165	7.22e-14			WDR77	0.46071	2.93163e-21
TXNDC5	0.506737	2.8e-12			KIF14	0.435369	6.47649e-19
BOD1	0.519984	5.96e-13			TMEM194A	0.436548	5.08796e-19
TULP3	0.600792	9.24e-18			NUP62	0.402328	3.85873e-16
POC1A	0.527293	2.46e-13			SH3GLB1	0.487245	6.21788e-24
ACIN1	0.533933	1.08e-13			DPH5	0.403401	3.17024e-16
DTYMK	0.522816	4.24e-13			CREB1	0.429977	1.92897e-18
EPB41	0.531516	1.46e-13			PNRC2	0.495644	7.90251e-25
TRIP13	0.654282	8.98e-22			SLC39A1	0.430043	1.90352e-18
MASTL	0.603546	5.99e-18			POLD3	0.505291	6.88007e-26
MEX3D	0.547271	1.97e-14			DR1	0.483156	1.66333e-23
BAK1	0.5332	1.19e-13			HOXC5	0.427854	2.94891e-18
SRSF10	0.624535	1.91e-19			HOXC4	0.548246	4.82982e-31
NUP62	0.507255	2.64e-12			POLR2D	0.403631	3.03931e-16
ATF5	0.569711	9.37e-16			CTTNBP2NL	0.480616	3.04478e-23
MLLT10	0.614423	1.04e-18			SFRS13A	0.458793	4.48129e-21
NIP7	0.56659	1.45e-15			CHIC2	0.424688	5.52181e-18
SLC4A2	0.501508	5.07e-12			PTAR1	0.420172	1.33581e-17
PSMB2	0.615668	8.44e-19			SNIP1	0.464115	1.37082e-21
NETO2	0.578402	2.71e-16			MED17	0.415672	3.18009e-17
NEK2	0.537395	7.01e-14			AK2	0.434567	7.62746e-19
RAD54B	0.502356	4.61e-12			KDM1A	0.476013	8.9901e-23
SERPINH1	0.546289	2.24e-14			DNTTIP2	0.454205	1.22363e-20
BUB1B	0.664377	1.27e-22			ZNF569	0.421812	9.70724e-18
CASP2	0.516222	9.31e-13			DEPDC1	0.437542	4.14839e-19
CCNA2	0.65345	1.05e-21			RPN2	0.42806	2.83018e-18
ODF2	0.568151	1.17e-15			HOXA7	0.485935	8.53496e-24
NUP93	0.536959	7.41e-14			CDK2	0.50021	2.51322e-25
E2F3	0.527443	2.42e-13			CEP55	0.426971	3.51484e-18
NUSAP1	0.640221	1.22e-20			ZNF383	0.420557	1.23972e-17
TRA2B	0.532578	1.28e-13			HIST1H3H	0.494779	9.79741e-25
ZNF726	0.541497	4.16e-14			ZNF790	0.439047	3.04195e-19
CDC6	0.66754	6.76e-23			ZNF792	0.457307	6.21455e-21
CDC20	0.673343	2.09e-23			ZNF436	0.439674	2.67187e-19
FSBP	0.510973	1.72e-12			PPIL5	0.427393	3.23223e-18
LRRC42	0.593183	3e-17			C15orf42	0.426308	4.00865e-18
CDCA8	0.64232	8.31e-21			STK38	0.482066	2.15741e-23
HNRNPH1	0.517327	8.17e-13			PARS2	0.438812	3.19331e-19
CDKN2C	0.668717	5.33e-23			PI4K2B	0.417243	2.35255e-17
KIF18B	0.639848	1.3e-20			NUP205	0.427574	3.11791e-18
PRC1	0.656073	6.38e-22			NR5A2	0.467342	6.61661e-22
TUBA1A	0.546215	2.26e-14			HIST1H2BJ	0.506105	5.58069e-26
MCM3	0.621826	3.02e-19			HIST1H2BK	0.467198	6.83593e-22
TAF11	0.535694	8.69e-14			TFDP2	0.402315	3.86811e-16
NRM	0.575941	3.86e-16			GABPB1	0.456758	7.00934e-21
MEAF6	0.522824	4.24e-13			CSE1L	0.447718	4.93626e-20
CHD4	0.525598	3.03e-13			PLOD1	0.42054	1.24383e-17
CSNK1G2	0.566958	1.38e-15			BCL10	0.438412	3.4677e-19
DHX15	0.583841	1.22e-16			MOBKL1B	0.423813	6.56006e-18
DPAGT1	0.524342	3.53e-13			NBLA00301	0.447053	5.68567e-20
DPH2	0.594304	2.53e-17			ZNF845	0.40241	3.80185e-16
ELAVL1	0.546595	2.15e-14			ZNF28	0.447952	4.69712e-20
EN1	0.543676	3.14e-14			PGD	0.460666	2.96046e-21
EN2	0.526329	2.77e-13			C1orf83	0.417143	2.39834e-17
FBL	0.613732	1.16e-18			SF3A3	0.514171	6.78467e-27
HDAC2	0.546052	2.31e-14			PKN2	0.486277	7.8589e-24
CCNF	0.671338	3.14e-23			HOXD4	0.795593	7.5316e-84
CDK1	0.641413	9.8e-21			SASS6	0.416437	2.74653e-17
CDC25A	0.531855	1.4e-13			LZIC	0.4474	5.28173e-20
CDC25C	0.629272	8.44e-20			RFWD3	0.428295	2.70067e-18
CDH11	0.52722	2.48e-13			ZMYM1	0.505708	6.1808e-26
CDK2	0.66396	1.38e-22			TMX1	0.416298	2.82048e-17
CEBPG	0.513703	1.25e-12			KIAA0090	0.461911	2.24415e-21
CENPA	0.645373	4.75e-21			PRR11	0.435353	6.49797e-19
CKS1B	0.614173	1.08e-18			SUV39H2	0.451953	1.99274e-20
CKS2	0.586744	7.93e-17			VANGL1	0.462308	2.05428e-21
COL4A1	0.560605	3.32e-15			CNOT1	0.409095	1.10348e-16
COL4A2	0.57351	5.47e-16			ITGB1	0.43114	1.52693e-18
CTPS1	0.685147	1.76e-24			SNX4	0.401053	4.87017e-16
E2F4	0.502065	4.76e-12			ZIK1	0.420035	1.37183e-17
ETV6	0.524584	3.43e-13			HNRNPR	0.511679	1.30892e-26
GAS1	0.514083	1.2e-12			RPRD1B	0.444304	1.0163e-19
H2AFX	0.620588	3.72e-19			ABCB7	0.455828	8.59225e-21
H2AFZ	0.53912	5.63e-14			SLC30A7	0.544566	1.42884e-30
ITGB1	0.513706	1.25e-12			EML4	0.464082	1.38086e-21
KIFC1	0.696077	1.6e-25			CNN3	0.403462	3.13509e-16
KPNA2	0.631812	5.42e-20			SCP2	0.430152	1.86238e-18
LAMB1	0.590414	4.57e-17			C1orf187	0.438387	3.48563e-19
LAMC1	0.569671	9.43e-16			SERPINB8	0.408529	1.22672e-16
LOXL2	0.561382	2.98e-15			PIK3R3	0.405773	2.04764e-16
MAD2L1	0.615073	9.31e-19			NFATC3	0.438906	3.13156e-19
MAGOH	0.589734	5.06e-17			HP1BP3	0.41773	2.14207e-17
MFNG	0.510809	1.75e-12			DISP1	0.415469	3.30581e-17
MKI67	0.504069	3.8e-12			YME1L1	0.462294	2.06066e-21
MYBL2	0.602177	7.44e-18			RCC2	0.457593	5.83594e-21
NRAS	0.609849	2.19e-18			SERBP1	0.527654	1.76344e-28
NUP88	0.522951	4.17e-13			GDAP2	0.515828	4.37024e-27
ODC1	0.529314	1.92e-13			USP1	0.521629	9.1945e-28
PGD	0.644553	5.53e-21			CDC42	0.436804	4.82766e-19
PLCG1	0.500618	5.61e-12			CDCA2	0.443139	1.29808e-19
POLA2	0.692325	3.69e-25			CDCA8	0.503647	1.04891e-25
PPP4C	0.596351	1.84e-17			HDGF	0.426331	3.99083e-18
PSMD3	0.513569	1.27e-12			ZMPSTE24	0.427236	3.3344e-18
PSMD8	0.521876	4.75e-13			TMED5	0.448124	4.52802e-20
PTBP1	0.640047	1.25e-20			SEPN1	0.424826	5.37397e-18
PTMS	0.542909	3.47e-14			UGDH	0.443935	1.09827e-19
RARS	0.511654	1.59e-12			TCEB3	0.497154	5.4207e-25
RBBP8	0.571959	6.82e-16			CEP135	0.484555	1.18963e-23
RBL1	0.52982	1.81e-13			PDIK1L	0.448369	4.29784e-20
RFC4	0.681615	3.73e-24			CHEK2	0.435302	6.56617e-19
RPA1	0.594134	2.59e-17			SIKE1	0.47703	7.08778e-23
RPN1	0.52934	1.92e-13			GINS4	0.400304	5.58088e-16
RPS2	0.584308	1.14e-16			FBXO42	0.404088	2.79406e-16
SMARCE1	0.559502	3.85e-15			EIF2C3	0.435233	6.65879e-19
SNAPC2	0.553917	8.18e-15			NIP7	0.433427	9.61718e-19
FSCN1	0.508368	2.32e-12			NUF2	0.414206	4.20585e-17
SNRPB	0.562746	2.47e-15			LRIG2	0.406866	1.67202e-16
SNRPC	0.565299	1.74e-15			ZCCHC11	0.412572	5.73555e-17
SOX11	0.566015	1.57e-15			CAPZA1	0.446807	5.99011e-20
SRM	0.588409	6.18e-17			KIF18A	0.44192	1.67489e-19
STC1	0.522036	4.66e-13			NOL11	0.433054	1.0373e-18
TCEB3	0.684931	1.84e-24			NOL10	0.426831	3.61351e-18
TGIF1	0.58644	8.3e-17			ZNF560	0.477609	6.18842e-23
TK1	0.616732	7.08e-19			MSH6	0.403259	3.25418e-16
TTK	0.617052	6.71e-19			CALU	0.471996	2.2828e-22
UBE2I	0.595088	2.24e-17			C19orf2	0.40916	1.09017e-16
VASP	0.524891	3.3e-13			EPB41	0.524937	3.7286e-28
VRK1	0.514602	1.13e-12			WEE1	0.49354	1.33198e-24
DEK	0.565108	1.78e-15			THRAP3	0.400172	5.71631e-16
HIST1H2BG	0.522942	4.18e-13			TTF2	0.439317	2.87642e-19
RAD54L	0.621093	3.42e-19			ISL2	0.442	1.64718e-19
TTF2	0.604571	5.09e-18			ZNF146	0.418422	1.87463e-17
NOP14	0.557002	5.41e-15			TANC1	0.441946	1.66565e-19
EIF3I	0.618366	5.39e-19			RPAP2	0.519889	1.47204e-27
SRSF9	0.557161	5.29e-15			OSR1	0.452125	1.91993e-20
SNX4	0.510129	1.9e-12			TMEM48	0.452782	1.66608e-20
GMPS	0.54463	2.78e-14			FAF1	0.445422	8.03022e-20
TMEM11	0.522284	4.52e-13			TAF12	0.415034	3.59218e-17
GGH	0.504189	3.75e-12			HOXD13	0.485981	8.44048e-24
HDAC3	0.524528	3.45e-13			HOXD10	0.636909	2.12761e-44
ZNF259	0.581707	1.67e-16			CDC20	0.420615	1.22567e-17
TIMELESS	0.631343	5.88e-20			C1orf103	0.430499	1.73691e-18
BCL10	0.52872	2.07e-13			C1orf109	0.421195	1.09494e-17
BYSL	0.54958	1.45e-14			RAD54L	0.401674	4.34911e-16
CAPN5	0.537878	6.59e-14			NRAS	0.511896	1.23632e-26
E2F2	0.708497	9.19e-27			RPF1	0.481107	2.70988e-23
EIF4EBP1	0.537024	7.35e-14			ZNF420	0.422753	8.07589e-18
FEN1	0.554894	7.18e-15			SOAT1	0.423852	6.50896e-18
SEMA3F	0.531334	1.5e-13			NEDD1	0.441897	1.68286e-19
PTTG1	0.590388	4.59e-17			DDX50	0.46089	2.81699e-21
RECQL4	0.55731	5.19e-15			BUB1	0.406672	1.73339e-16
ACTL6A	0.588124	6.45e-17			C11orf82	0.449086	3.68801e-20
CALR	0.501584	5.03e-12			IQGAP2	0.435348	6.5049e-19
CDC34	0.551734	1.09e-14			CCNB2	0.402802	3.53858e-16
EPHB2	0.512223	1.49e-12			CCNB1	0.408081	1.33373e-16
FOXD1	0.69687	1.34e-25			LOC148189	0.432427	1.17765e-18
HNRNPAB	0.544501	2.82e-14			PHC2	0.43769	4.02464e-19
ILF2	0.514535	1.14e-12			SMC4	0.468089	5.58342e-22
KIF11	0.612314	1.46e-18			SNRNP40	0.494104	1.15829e-24
MCM2	0.599627	1.11e-17			ASPM	0.452886	1.62898e-20
YBX1	0.709352	7.51e-27			WNT5A	0.430225	1.83535e-18
SMS	0.511942	1.54e-12			RBM12	0.422225	8.95422e-18
SNRPA	0.606012	4.05e-18			PRPF38A	0.402324	3.8618e-16
TOP3A	0.608792	2.59e-18			WDR3	0.502229	1.50568e-25
TTC4	0.510769	1.76e-12			PAFAH2	0.430808	1.63233e-18
CCNB2	0.668422	5.66e-23			C1orf144	0.492574	1.69087e-24
ZW10	0.572157	6.63e-16			IGSF5	0.46388	1.44498e-21
MTA2	0.53371	1.11e-13			HOXD11	0.420551	1.24115e-17
B4GALT5	0.507896	2.45e-12			ZNF468	0.405744	2.05874e-16
POLR2D	0.57541	4.17e-16			IFT52	0.407197	1.57218e-16
SNRNP40	0.688236	9.03e-25			GALNT1	0.412493	5.82184e-17
KIF23	0.629842	7.65e-20			CBX2	0.447725	4.92881e-20
PDIA4	0.60633	3.85e-18			LOXL2	0.445162	8.48361e-20
ACTN4	0.607932	2.98e-18			WARS2	0.404298	2.68818e-16
ABCC1	0.544137	2.96e-14			DOCK11	0.436318	5.3338e-19
PFN1	0.647392	3.28e-21			CDH11	0.489983	3.19347e-24
PLK1	0.674643	1.6e-23			SFMBT1	0.45789	5.46726e-21
SFPQ	0.610882	1.85e-18			ACTL6A	0.435226	6.6677e-19
SIAH2	0.570085	8.89e-16			IRX5	0.594057	1.99656e-37
THRAP3	0.581435	1.74e-16			SLC5A3	0.407595	1.46006e-16
CBX2	0.624714	1.85e-19			WDHD1	0.408152	1.31611e-16
CDKN3	0.58618	8.62e-17			YRDC	0.455215	9.82201e-21
DDOST	0.708168	9.93e-27			LSM14A	0.412818	5.47445e-17
E2F1	0.658149	4.28e-22			POLR3C	0.412605	5.6995e-17
GNG5	0.628627	9.44e-20			HOXD8	0.77575	3.50693e-77
SLC20A1	0.529634	1.85e-13			HOXD9	0.721779	4.6107e-62
XRCC2	0.625253	1.69e-19			C1orf226	0.425618	4.59524e-18
CHAF1B	0.552037	1.05e-14			PRMT6	0.422925	7.80808e-18
CHAF1A	0.672469	2.5e-23			HOXD3	0.784643	4.40915e-80
UBA2	0.500108	5.93e-12			NCAPD2	0.509326	2.4221e-26
HMGN2	0.599062	1.21e-17			ZW10	0.517467	2.82254e-27
HSPG2	0.57509	4.36e-16			ZSCAN20	0.42313	7.50108e-18
LMNB1	0.670277	3.89e-23			EYA3	0.413702	4.62928e-17
SRSF4	0.625602	1.59e-19			KDM4A	0.509618	2.2446e-26
SOLH	0.530165	1.73e-13			TMEM69	0.42579	4.44144e-18
ARPC5	0.565575	1.67e-15			HIST1H2AG	0.497991	4.39441e-25
KIF20A	0.667742	6.49e-23			ZMYM4	0.442799	1.39377e-19
ALYREF	0.53012	1.74e-13			S100PBP	0.46841	5.1904e-22
DDX39A	0.513763	1.24e-12			GTF2B	0.416096	2.93195e-17
TRAIP	0.555054	7.03e-15			ZNF507	0.41384	4.50907e-17
MCM6	0.606212	3.92e-18			ST7L	0.442983	1.34106e-19
MAP3K4	0.54087	4.51e-14			MICB	0.444632	9.48583e-20
CLPP	0.509322	2.08e-12			GNL2	0.477178	6.84704e-23
TUBA1B	0.509125	2.13e-12			PLAGL2	0.403294	3.23324e-16
NDC80	0.654767	8.19e-22			C1orf112	0.467165	6.88646e-22
CAPZA1	0.525149	3.2e-13			MCM8	0.436152	5.51878e-19
POLE	0.577995	2.87e-16			CDKAL1	0.413915	4.44548e-17
ANP32A	0.515075	1.07e-12			MAP3K1	0.435107	6.83249e-19
RAN	0.546101	2.29e-14			EVX2	0.401798	4.25167e-16
HMG20B	0.577874	2.92e-16			C5orf34	0.406776	1.70034e-16
TACC3	0.690905	5.04e-25			NOC3L	0.410739	8.10608e-17
PPIH	0.636457	2.39e-20			DHX15	0.462061	2.17044e-21
TIMM44	0.538623	6e-14			ZNF568	0.438844	3.17203e-19
LRRC41	0.527825	2.31e-13			ZNF567	0.411534	6.97826e-17
RNASEH2A	0.643869	6.27e-21			ZNF566	0.412	6.39147e-17
SPAG5	0.636586	2.33e-20			SRP72	0.408717	1.1843e-16
POLR3C	0.568744	1.07e-15			HSPA14	0.402284	3.88997e-16
GNAI3	0.582265	1.54e-16			PDS5A	0.423811	6.56222e-18
MCAM	0.597848	1.46e-17			PHEX	0.408544	1.22322e-16
TRIM27	0.545857	2.37e-14			CENPL	0.481278	2.60237e-23
IGF2BP3	0.549784	1.42e-14			CENPF	0.402655	3.63466e-16
PHTF1	0.531364	1.49e-13			CENPA	0.414513	3.96722e-17
DBF4	0.639199	1.46e-20			PLEKHA2	0.471436	2.59683e-22
CENPI	0.637623	1.94e-20			CTPS	0.413529	4.78374e-17
MCM5	0.612071	1.52e-18			YBX1	0.446296	6.67565e-20
WDR3	0.620632	3.69e-19			PRIM2	0.449502	3.3741e-20
KDELR1	0.533157	1.19e-13			LOC400043	0.43656	5.0759e-19
SF3A3	0.663763	1.43e-22			DCLRE1B	0.523538	5.46806e-28
PDIA5	0.533045	1.21e-13			NADK	0.435156	6.7644e-19
LMAN2	0.510535	1.81e-12			C19orf40	0.415115	3.53675e-17
CKAP4	0.53407	1.07e-13			TXLNA	0.48163	2.39326e-23
KIF2C	0.695963	1.64e-25			PABPC4	0.410607	8.31031e-17
CNTRL	0.588373	6.21e-17			ZNF527	0.420789	1.1848e-17
TOPBP1	0.561003	3.14e-15			FKBP7	0.425125	5.06584e-18
EMILIN1	0.531111	1.54e-13			KIF2C	0.526946	2.14511e-28
FAF1	0.648941	2.46e-21			GPX7	0.445191	8.43176e-20
PTP4A3	0.516813	8.68e-13			FLNA	0.428131	2.79013e-18
TCF19	0.529425	1.9e-13			RAD51AP1	0.453064	1.56747e-20
ZNF90	0.622425	2.73e-19			RBM15	0.485493	9.49474e-24
DDX20	0.612875	1.34e-18			HAND2	0.542424	2.66971e-30
DUSP10	0.503448	4.07e-12			HIST2H4A	0.460567	3.02622e-21
LYPLA2	0.62031	3.9e-19			ZNF260	0.428544	2.56953e-18
STK38	0.659351	3.39e-22			RBBP8	0.408697	1.18884e-16
OIP5	0.669045	4.99e-23			RBBP4	0.495649	7.89221e-25
PAXIP1	0.512984	1.36e-12			BTF3L4	0.47881	4.66523e-23
RALY	0.517276	8.22e-13			CYB5RL	0.415055	3.57741e-17
CD93	0.582976	1.39e-16			HOXA11AS	0.469853	3.73362e-22
CCT5	0.537142	7.24e-14			INTS9	0.464187	1.34876e-21
TPX2	0.693605	2.78e-25			YTHDF2	0.491314	2.30496e-24
XRN2	0.613595	1.19e-18			TGIF1	0.418468	1.85812e-17
TRAM2	0.520503	5.6e-13			NFYC	0.411048	7.64868e-17
ESPL1	0.653346	1.07e-21			FNDC3B	0.495336	8.53104e-25
KIF4A	0.691716	4.22e-25			CCDC138	0.423954	6.38021e-18
LSM4	0.505384	3.27e-12			POLE3	0.426303	4.01314e-18
HMMR	0.60694	3.49e-18			STT3A	0.40116	4.77627e-16
NXT1	0.543333	3.28e-14
GNL2	0.689276	7.2e-25
SEC61A1	0.618773	5.04e-19
ABT1	0.532856	1.24e-13
NRBP1	0.589135	5.54e-17
TONSL	0.628675	9.36e-20
FAM32A	0.523553	3.88e-13
ATAD2	0.580213	2.08e-16
NUDT5	0.544172	2.95e-14
UBE2T	0.606213	3.92e-18
HOXD9	0.614509	1.02e-18
ADAMTS7	0.501641	5e-12
DNAJC8	0.570616	8.25e-16
ORC6	0.581496	1.72e-16
DNAJC2	0.571537	7.24e-16
UBE2S	0.591423	3.92e-17
ZNF232	0.508874	2.19e-12
DNTTIP2	0.573553	5.44e-16
TTI1	0.521159	5.18e-13
KDM4A	0.595416	2.13e-17
DHX34	0.529589	1.86e-13
KNTC1	0.538761	5.9e-14
BMS1	0.516947	8.55e-13
URB2	0.539307	5.5e-14
NCAPD2	0.610285	2.04e-18
KIF14	0.664857	1.15e-22
RRP1B	0.529774	1.82e-13
SIPA1L3	0.61032	2.02e-18
NUP205	0.570289	8.64e-16
DNAJC9	0.532838	1.24e-13
NCAPD3	0.514835	1.1e-12
HAUS5	0.614203	1.07e-18
NUP188	0.64565	4.52e-21
NOL11	0.560007	3.6e-15
NOC2L	0.580232	2.07e-16
GPX7	0.680094	5.14e-24
GEMIN4	0.55493	7.15e-15
TXNDC12	0.557787	4.86e-15
UTP11L	0.608214	2.84e-18
DESI2	0.558603	4.35e-15
GINS2	0.597291	1.6e-17
SDF4	0.550998	1.21e-14
MRTO4	0.573486	5.49e-16
CPSF3	0.528404	2.15e-13
PLEKHO1	0.557729	4.9e-15
HP1BP3	0.52578	2.96e-13
CENPF	0.695099	1.99e-25
GTSE1	0.631811	5.42e-20
MRPL37	0.649049	2.41e-21
PLXNA3	0.526604	2.68e-13
C2orf29	0.504179	3.75e-12
DONSON	0.574234	4.93e-16
GATAD2A	0.535509	8.89e-14
PNRC2	0.590375	4.6e-17
SPDL1	0.531732	1.43e-13
CHCHD3	0.508479	2.3e-12
WRAP73	0.603711	5.84e-18
ADPRHL2	0.54206	3.87e-14
C1orf109	0.502722	4.42e-12
PARPBP	0.565182	1.77e-15
CDCA4	0.536767	7.59e-14
ZWILCH	0.527328	2.45e-13
TMEM45A	0.577003	3.31e-16
GPATCH1	0.526573	2.69e-13
TMEM39B	0.667109	7.36e-23
PRPF38B	0.534916	9.58e-14
HELLS	0.572715	6.13e-16
GPN2	0.537401	7e-14
RFWD3	0.632527	4.78e-20
TSR1	0.536904	7.46e-14
CEP55	0.608899	2.55e-18
ASPM	0.652015	1.38e-21
PRMT6	0.501331	5.17e-12
ASF1B	0.661506	2.23e-22
C1orf112	0.544913	2.68e-14
NEIL3	0.618255	5.49e-19
BRIX1	0.540365	4.81e-14
MNS1	0.523988	3.68e-13
DEPDC1B	0.569044	1.03e-15
HJURP	0.641595	9.48e-21
PBK	0.600902	9.09e-18
LRRC59	0.541068	4.39e-14
BIN3	0.506129	3e-12
CTTNBP2NL	0.509267	2.1e-12
RCC2	0.519245	6.51e-13
MIS18A	0.529675	1.84e-13
DAZAP1	0.53702	7.35e-14
FBXO42	0.531293	1.5e-13
FAM64A	0.631205	6.03e-20
CHPF2	0.523573	3.87e-13
PUS7	0.597678	1.5e-17
UBFD1	0.549653	1.44e-14
RAD18	0.575216	4.29e-16
RNPEP	0.576163	3.74e-16
KIF15	0.606602	3.68e-18
PTGFRN	0.555847	6.32e-15
SPC25	0.507338	2.62e-12
XPO5	0.566018	1.57e-15
SLAIN2	0.559714	3.74e-15
ZNF492	0.539109	5.64e-14
ZNF530	0.505914	3.08e-12
USP28	0.606512	3.74e-18
KIAA1524	0.583104	1.36e-16
HIST1H2AE	0.501684	4.97e-12
GINS1	0.65898	3.64e-22
TRAF2	0.61094	1.83e-18
XRCC5	0.544884	2.69e-14
WIZ	0.546135	2.28e-14
TMEM8A	0.611371	1.71e-18
CDC25B	0.596507	1.8e-17
FANCE	0.503503	4.05e-12
TMSB15A	0.549608	1.45e-14
TIA1	0.590729	4.36e-17
MTBP	0.611884	1.57e-18
CSNK1G1	0.509667	2e-12
CHTF18	0.555638	6.5e-15
CLSPN	0.653235	1.1e-21
CENPK	0.624402	1.95e-19
NCAPG	0.642602	7.9e-21
EXO5	0.612762	1.36e-18
PLEKHG2	0.657772	4.6e-22
DCLRE1B	0.672696	2.38e-23
CENPH	0.610628	1.93e-18
VKORC1	0.526348	2.76e-13
AUNIP	0.570635	8.23e-16
CENPM	0.569603	9.52e-16
KDELC1	0.503398	4.1e-12
DSCC1	0.536535	7.81e-14
WDR77	0.576367	3.63e-16
NKAIN1	0.520146	5.84e-13
MUL1	0.551982	1.06e-14
CCNJL	0.508596	2.26e-12
HECTD3	0.544191	2.94e-14
MLF1IP	0.575364	4.2e-16
YRDC	0.603844	5.71e-18
GLT25D1	0.595636	2.06e-17
IPO4	0.51078	1.76e-12
SHCBP1	0.631473	5.75e-20
EHMT1	0.526049	2.87e-13
ZMYM1	0.506779	2.79e-12
RNF122	0.652893	1.17e-21
RPAP2	0.509602	2.02e-12
NUP85	0.618362	5.4e-19
ATAD5	0.55172	1.1e-14
WDR76	0.542391	3.71e-14
CCDC15	0.509757	1.98e-12
RPF1	0.613867	1.14e-18
TOE1	0.600266	1e-17
C16orf59	0.566246	1.52e-15
C17orf70	0.569924	9.1e-16
ITPKC	0.506652	2.83e-12
ZSCAN16	0.523023	4.14e-13
REEP4	0.616597	7.24e-19
FAM83D	0.500507	5.68e-12
CDT1	0.609917	2.16e-18
ISG20L2	0.516871	8.63e-13
CABLES2	0.523691	3.82e-13
KIF18A	0.643468	6.74e-21
CDCA3	0.524032	3.66e-13
PLVAP	0.517606	7.91e-13
GRWD1	0.512714	1.41e-12
FRMD8	0.612341	1.46e-18
C1QTNF6	0.542192	3.8e-14
CDCA7	0.544212	2.93e-14
GSG2	0.637564	1.96e-20
CCNB1	0.648656	2.59e-21
RNF26	0.547557	1.9e-14
STK40	0.502682	4.44e-12
BRIP1	0.5966	1.77e-17
WDR54	0.536988	7.38e-14
TRAF7	0.557494	5.06e-15
ZDHHC18	0.652486	1.26e-21
FBXW9	0.543924	3.04e-14
GINS4	0.685004	1.81e-24
DOT1L	0.529401	1.9e-13
TUBB6	0.517481	8.02e-13
SKP2	0.511057	1.7e-12
DHX37	0.528169	2.21e-13
BUD13	0.537958	6.53e-14
LMNB2	0.702284	3.91e-26
CEP89	0.572439	6.37e-16
ARHGEF39	0.597639	1.51e-17
FAM136A	0.580409	2.02e-16
SYDE1	0.641728	9.26e-21
HAUS8	0.587177	7.43e-17
TSSK3	0.500544	5.65e-12
WDR34	0.56537	1.72e-15
MGME1	0.624407	1.95e-19
FN1	0.502883	4.34e-12
UBE2J2	0.506555	2.86e-12
HIST1H2BK	0.548789	1.61e-14
MED30	0.532368	1.32e-13
CDCA5	0.658779	3.79e-22
DCAF15	0.568363	1.13e-15
C19orf52	0.50208	4.76e-12
FAM114A1	0.521171	5.17e-13
SHKBP1	0.542741	3.54e-14
HAUS1	0.610377	2.01e-18
ZMYND19	0.515006	1.07e-12
C11orf84	0.596866	1.7e-17
EXOC3L2	0.562065	2.72e-15
PPP1R14B	0.552345	1.01e-14
CANT1	0.533626	1.13e-13
DPP9	0.577716	2.99e-16
RPIA	0.54054	4.7e-14
HN1L	0.579488	2.31e-16
SCLT1	0.559901	3.65e-15
CCDC138	0.595929	1.97e-17
C11orf82	0.632905	4.48e-20
SKA3	0.622091	2.89e-19
MAP2K3	0.522585	4.36e-13
RTKN2	0.587661	6.91e-17
NUF2	0.611537	1.66e-18
ISL2	0.554152	7.93e-15
TICRR	0.643073	7.25e-21
C19orf40	0.599387	1.15e-17
PARS2	0.524128	3.62e-13
NASP	0.57938	2.35e-16
RMI2	0.553703	8.42e-15
LSM12	0.539542	5.34e-14
EME1	0.544431	2.85e-14
ZNF560	0.619253	4.65e-19
B3GALNT2	0.500371	5.76e-12
CKAP2L	0.666863	7.73e-23
CDCA2	0.635579	2.79e-20
DCP1B	0.516232	9.3e-13
AKNAD1	0.526054	2.86e-13
ZNF75A	0.533047	1.21e-13
PUSL1	0.546045	2.31e-14
HOXC4	0.56731	1.31e-15
IKBIP	0.558092	4.67e-15
ZNF367	0.658061	4.35e-22
PHF13	0.601167	8.72e-18
SALL3	0.543818	3.08e-14
C18orf54	0.523556	3.88e-13
NSMCE2	0.554712	7.36e-15
LYG1	0.520108	5.87e-13
LDLRAD3	0.520099	5.88e-13
GAS2L3	0.571879	6.9e-16
TXLNA	0.70916	7.86e-27
NR2C2AP	0.534369	1.03e-13
PPM1G	0.584338	1.13e-16
TUBB	0.690659	5.32e-25
IQGAP3	0.620374	3.85e-19
UBE2C	0.597189	1.62e-17
ZBTB12	0.538853	5.83e-14
SPC24	0.587619	6.96e-17
UBALD2	0.527526	2.39e-13
SASS6	0.586378	8.37e-17
KIF24	0.511421	1.63e-12
AURKA	0.647242	3.37e-21
MMS22L	0.598859	1.25e-17
DRAXIN	0.594265	2.54e-17
C5orf34	0.631889	5.35e-20
AGRN	0.523278	4.01e-13
FAM111B	0.616655	7.17e-19
CARM1	0.585872	9.03e-17
CCDC137	0.519617	6.23e-13
POLQ	0.58983	4.99e-17
E2F7	0.579502	2.31e-16
LRR1	0.57112	7.68e-16
CCDC18	0.695415	1.86e-25
C1orf174	0.5704	8.51e-16
LOC541471	0.515568	1.01e-12
LOC400043	0.539988	5.04e-14
RHPN1-AS1	0.511383	1.64e-12
LOC286467	0.504017	3.82e-12
LOC90784	0.513305	1.31e-12
BTN2A3P	0.523454	3.93e-13
DDX12P	0.594894	2.31e-17
CRNDE	0.60567	4.28e-18
LOC100128361	0.537388	7.02e-14
ITGB3BP	0.623031	2.46e-19
RACGAP1	0.514762	1.11e-12
HOXD8	0.618741	5.07e-19
EZH2	0.644415	5.67e-21
DDX11	0.536921	7.44e-14
PKMYT1	0.598657	1.29e-17
DLGAP5	0.597203	1.62e-17
NCAPH	0.558135	4.64e-15
DTL	0.597932	1.44e-17
MND1	0.543898	3.05e-14
HOXD-AS2	0.592846	3.16e-17
MELK	0.585937	8.94e-17
POLD1	0.534322	1.03e-13
ZNF850	0.518442	7.16e-13
FOXM1	0.557449	5.09e-15
MCM10	0.603614	5.93e-18
SKA1	0.607444	3.22e-18
C2orf48	0.531174	1.53e-13
CDC45	0.551682	1.1e-14
EXO1	0.628119	1.03e-19
RAD51	0.512941	1.37e-12

## Sheet: overlap genes
NUP93
STK40
PDIA5
TTC4
DLGAP5
RAD54B
PSMB2
RRP1B
LRRC41
LRRC42
TRAM2
ITGB3BP
DDX20
SLAIN2
GBE1
RPA1
XRN2
MFNG
UTP11L
EN1
RAD18
E2F2
GAS2L3
PHACTR4
LMNB2
FOXD1
DEK
GNAI3
DDOST
HMGN2
CCDC18
SIPA1L3
GNG5
SMARCE1
CCDC15
TXNDC12
EXOSC10
KIF4A
WDR77
KIF14
NUP62
PNRC2
HOXC4
POLR2D
CTTNBP2NL
KDM1A
DNTTIP2
DEPDC1
RPN2
CDK2
CEP55
ZNF436
STK38
PARS2
NUP205
HIST1H2BJ
HIST1H2BK
PLOD1
BCL10
PGD
SF3A3
HOXD4
SASS6
RFWD3
ZMYM1
PRR11
ITGB1
SNX4
ZIK1
SLC30A7
HP1BP3
RCC2
SERBP1
USP1
CDCA2
CDCA8
HDGF
TCEB3
GINS4
FBXO42
NIP7
NUF2
CAPZA1
KIF18A
NOL11
ZNF560
MSH6
EPB41
WEE1
THRAP3
TTF2
ISL2
ZNF146
RPAP2
FAF1
TAF12
CDC20
C1orf109
RAD54L
NRAS
RPF1
C11orf82
CCNB2
CCNB1
SMC4
SNRNP40
ASPM
WDR3
CBX2
LOXL2
CDH11
ACTL6A
IRX5
YRDC
POLR3C
HOXD8
HOXD9
PRMT6
HOXD3
NCAPD2
ZW10
KDM4A
GNL2
C1orf112
C5orf34
DHX15
PDS5A
CENPF
CENPA
YBX1
PRIM2
LOC400043
DCLRE1B
C19orf40
TXLNA
PABPC4
FKBP7
KIF2C
GPX7
RAD51AP1
RBBP8
RBBP4
CYB5RL
TGIF1
CCDC138
